# Supplementary material for: The effect of standardized food intake on the association between BMI and 1H-NMR metabolites
Source: PubMed Central journal article supplement (PMC5155225; doi:10.1038/srep38980), 2016-12-14
Supplement: srep38980-s1.pdf [file srep38980-s1.pdf]

Supplementary Information for

**The effect of standardized food intake on the association between BMI and <sup>1</sup>H-NMR metabolites**

Bianca A.M. Schutte<sup>1\*</sup>, Erik B. van den Akker<sup>1,2</sup>, Joris Deelen<sup>1</sup>, Ondine van de Rest<sup>3</sup>, Diana van Heemst<sup>4</sup>, Edith J.M. Feskens<sup>3</sup> Marian Beekman<sup>1#</sup> and P. Eline Slagboom<sup>1#\*</sup>

<sup>1</sup> *Department of Molecular Epidemiology, Leiden University Medical Center, 2300 RC Leiden, The Netherlands*

<sup>2</sup> *The Delft Bioinformatics Lab, Delft University of Technology, 2628 CD Delft, The Netherlands*

<sup>3</sup> *Division of Human Nutrition, Wageningen University, 6700 EV Wageningen, The Netherlands*

<sup>4</sup> *Department of Gerontology and Geriatrics, Leiden University Medical Center, 2300 RC Leiden, The Netherlands*

# *shared last author*

\* *corresponding author*

**Supplementary Figure S1** | Effect size of the association between BMI and metabolites in fasting status in this study and Würtz *et al.* (2014)<sup>1</sup>

**Supplementary Figure S2** | Effect size of the association between BMI and metabolites before and after the standardized liquid meal

**Supplementary Figure S3** | Effect size of the association between insulin and metabolites before and after the standardized liquid meal.

**Supplementary Figure S4** | Histogram of the time between consumption of the SLM and the collection of the non-fasted blood sample, in minutes.

**Supplementary Table S1** | Changes in metabolite levels after the standardized liquid meal

**Supplementary Table S2** | Effect size of the association between BMI and metabolites before and after the standardized liquid meal

**Supplementary Table S3** | Effect size of the association between BMI and metabolites in this study and study done by Würtz *et al.* (2014)<sup>1</sup>

**Supplementary Table S4** | Interaction between SLM and BMI

**Supplementary Table S5** | Effect size of the association between diastolic blood pressure and metabolites before and after the standardized liquid meal

**Supplementary Table S6** | Effect size of the association between insulin and metabolites before and after the standardized liquid meal

**Supplementary Table S7** | Nutritional content Nutridrink

**Supplementary Table S8** | Nutritional content amino acids Nutridrink

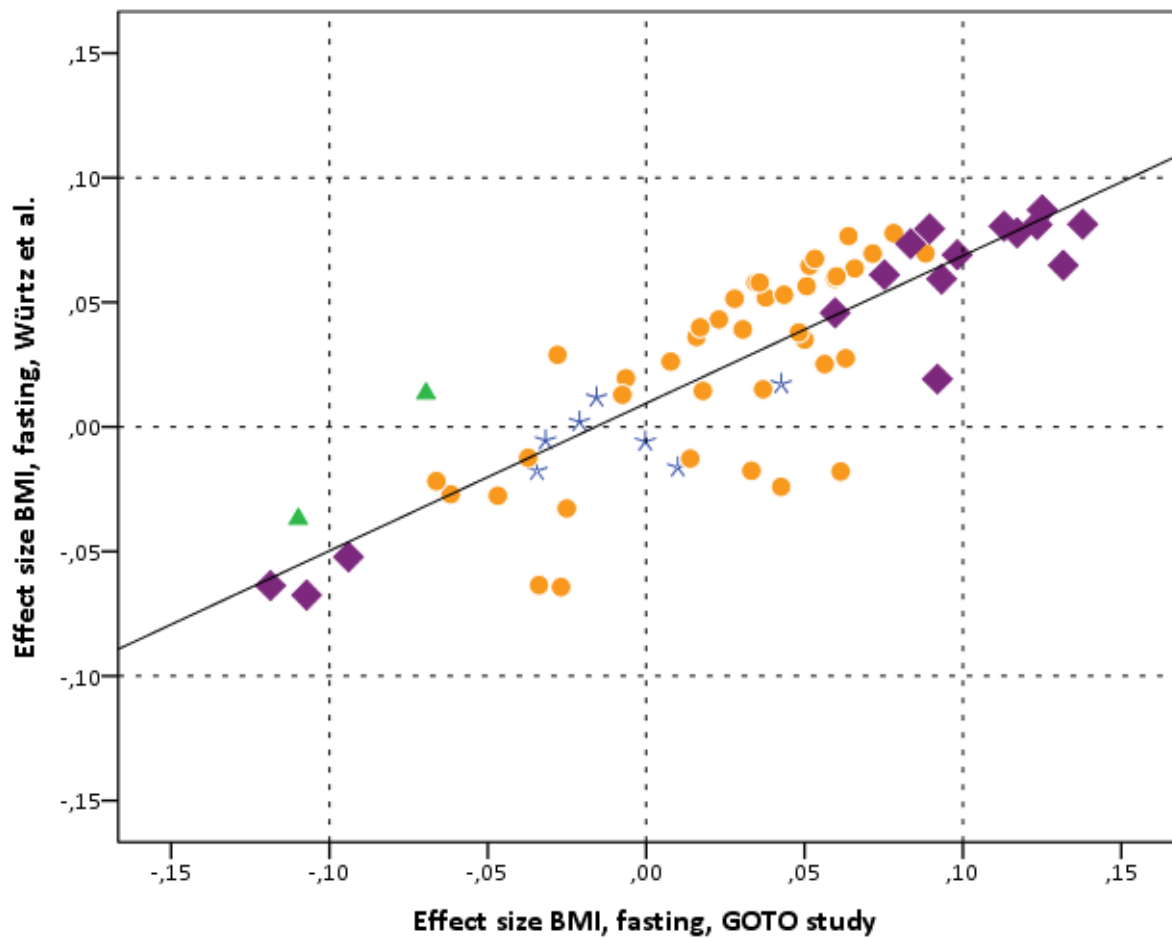

**Supplementary Figure S1** | Effect size of the association between BMI and metabolites in fasting status in this study and Würtz *et al.* (2014)<sup>1</sup>

Effect sizes indicate the association magnitudes in units of 1-SD metabolite concentration per 1-kg/m<sup>2</sup> increment in BMI. Each dot represents a metabolite. Purple diamonds indicate the metabolite was significantly associated with BMI in this study and Würtz *et al.*; green triangle: only significant in this study; orange circles: only significant in the study of Würtz *et al.*; blue crosses: not significant in one of the studies

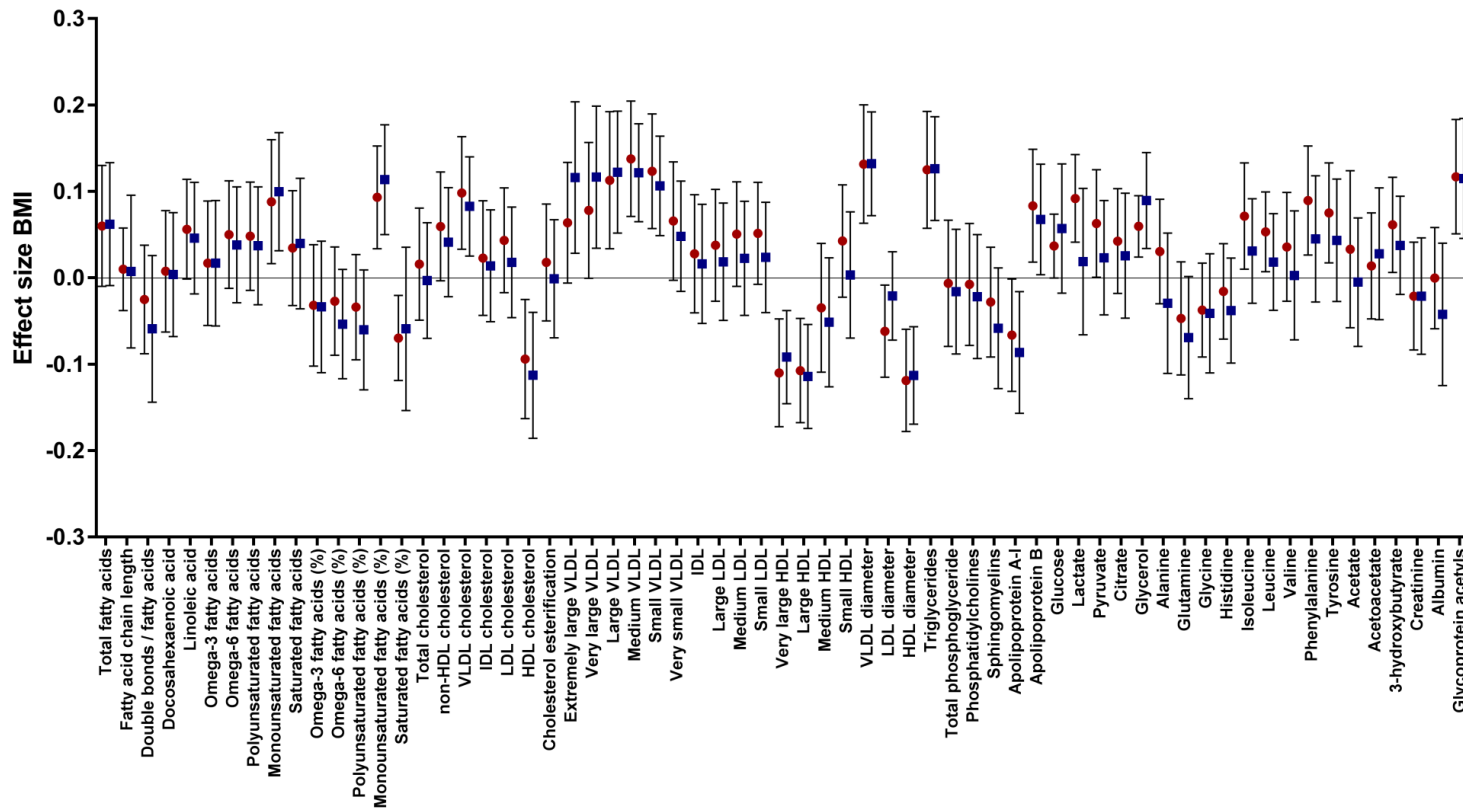

**Supplementary Figure S2** | Effect size of the association between BMI and metabolites before and after the standardized liquid meal

Effect sizes indicate the association magnitudes in units of 1-SD metabolite concentration per 1-kg/m<sup>2</sup> increment in BMI. Error bars indicate 95% confidence interval. Red circles indicate the effect size in fasting samples; blue squares indicate the effect size in postprandial samples. Double bonds/fatty acids: the number of double bonds in fatty acids. VLDL, very low density lipoprotein; IDL, intermediate density lipoprotein; LDL, low density lipoprotein; HDL, high density lipoprotein.

# Insulin

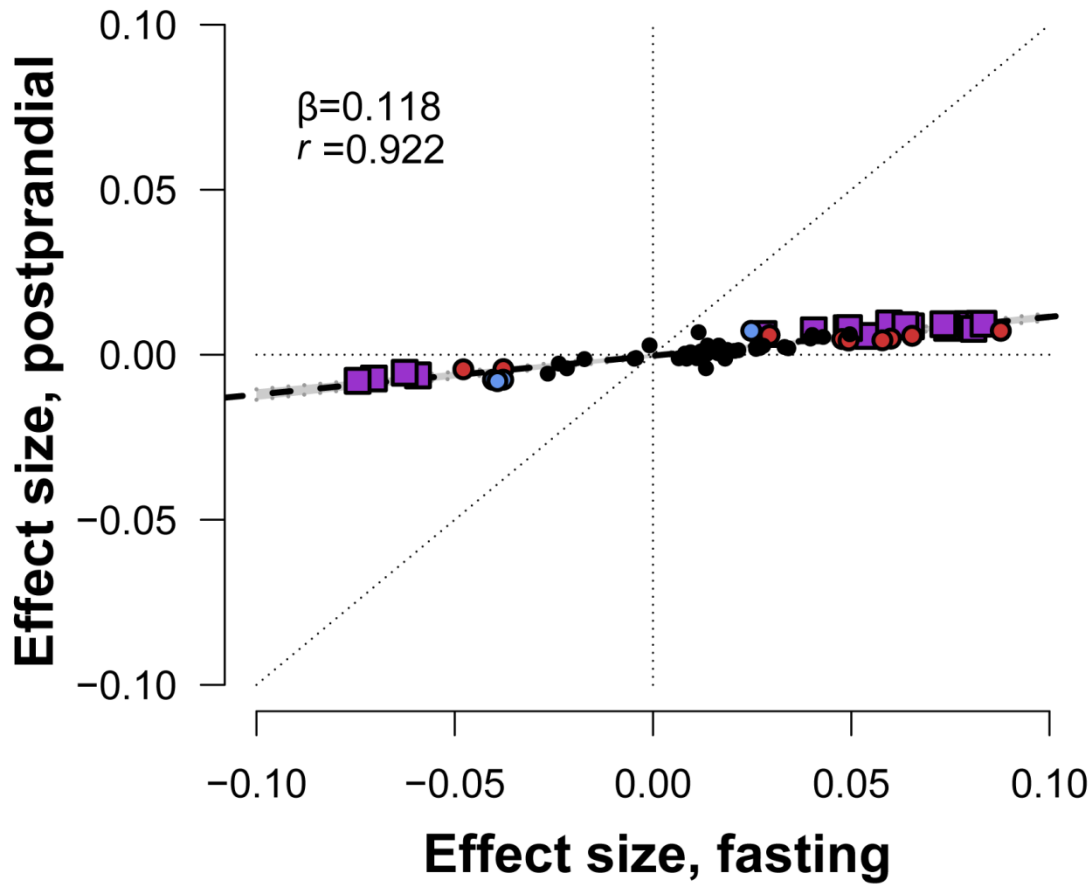

**Supplementary Figure S3** | Effect size of the association between insulin and metabolites before and after the standardized liquid meal.

Effect sizes indicate the association magnitudes in units of 1-SD metabolite concentration per 1-SD metabolite concentration per 1-MU/L increment in insulin. Each dot represents a metabolite. Purple squares indicate the metabolite was significantly associated with BMI before and after the standardized liquid meal; red circles: only significant in fasting samples; blue circles: only significant in postprandial samples; black circles: not significant in fasting and postprandial samples

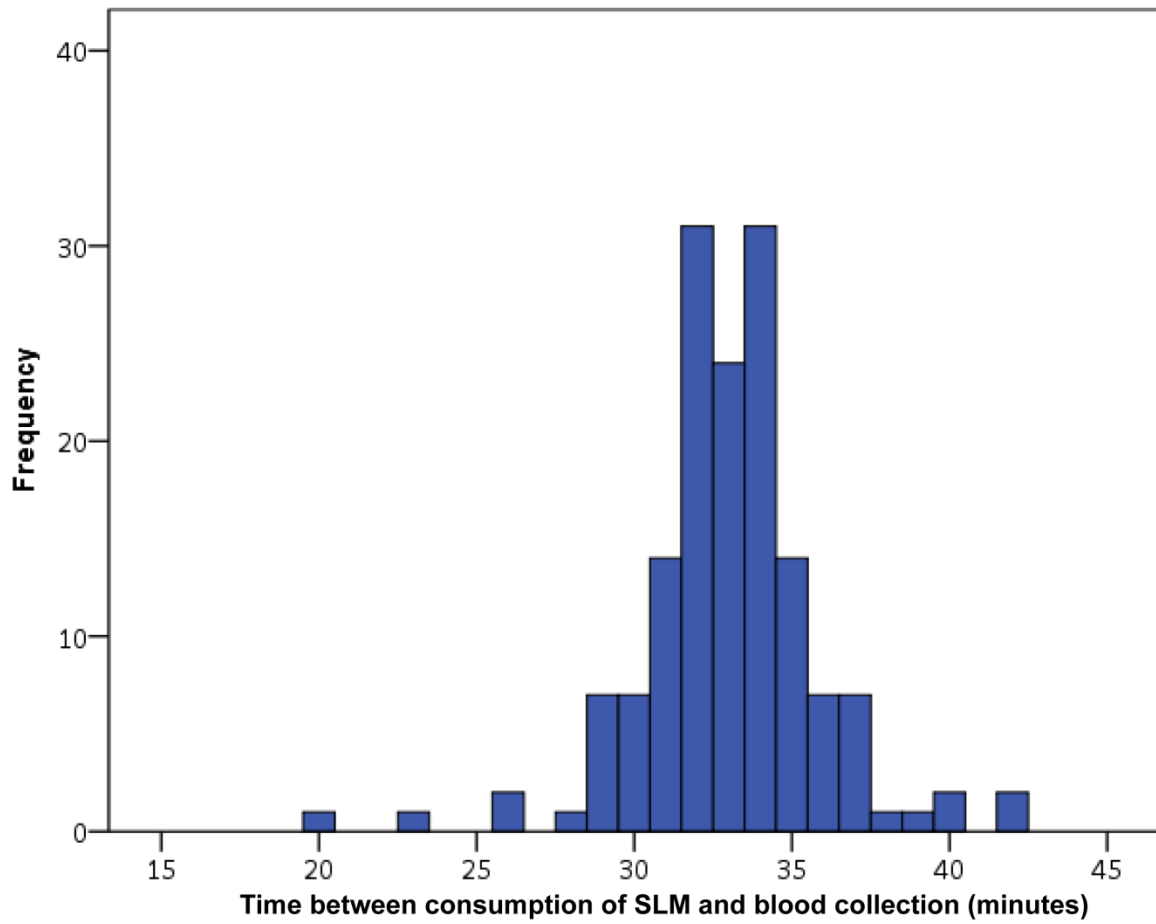

**Supplementary Figure S4** | Histogram of the time between consumption of the SLM and the collection of the non-fasted blood sample, in minutes.

**Supplementary Table S1** | Changes in metabolite levels after the standardized liquid meal

|                                                   | N   | Change | P-value*        | 95% CI |        |
|---------------------------------------------------|-----|--------|-----------------|--------|--------|
| <b>Fatty acids</b>                                |     |        |                 |        |        |
| Total fatty acids                                 | 146 | 0.169  | <b>2.05E-04</b> | 0.080  | 0.259  |
| Fatty acid chain length                           | 146 | 0.409  | <b>1.80E-04</b> | 0.195  | 0.624  |
| Double bonds / fatty acids                        | 146 | -0.070 | 0.262           | -0.192 | 0.052  |
| Docosahexaenoic acid                              | 146 | 0.083  | <b>0.001</b>    | 0.034  | 0.132  |
| Linoleic acid                                     | 146 | 0.095  | <b>0.006</b>    | 0.027  | 0.163  |
| Omega-3 fatty acids                               | 146 | 0.135  | <b>4.38E-06</b> | 0.077  | 0.192  |
| Omega-6 fatty acids                               | 146 | 0.092  | <b>0.021</b>    | 0.014  | 0.170  |
| Polyunsaturated fatty acids                       | 146 | 0.104  | <b>0.010</b>    | 0.025  | 0.183  |
| Monounsaturated fatty acids                       | 146 | 0.087  | <b>0.031</b>    | 0.008  | 0.166  |
| Saturated fatty acids                             | 146 | 0.241  | <b>8.53E-05</b> | 0.121  | 0.361  |
| <b>Fatty acids, relative to total fatty acids</b> |     |        |                 |        |        |
| Omega-3 fatty acids (%) <sup>†</sup>              | 146 | 0.016  | 0.493           | -0.030 | 0.063  |
| Omega-6 fatty acids (%) <sup>†</sup>              | 146 | -0.169 | <b>0.004</b>    | -0.284 | -0.054 |
| Polyunsaturated fatty acids (%) <sup>†</sup>      | 146 | -0.159 | <b>0.009</b>    | -0.277 | -0.040 |
| Monounsaturated fatty acids (%) <sup>†</sup>      | 146 | -0.063 | 0.128           | -0.144 | 0.018  |
| Saturated fatty acids (%) <sup>†</sup>            | 146 | 0.256  | <b>0.008</b>    | 0.066  | 0.447  |
| <b>Cholesterol</b>                                |     |        |                 |        |        |
| Total cholesterol                                 | 153 | 0.114  | <b>4.22E-04</b> | 0.051  | 0.177  |
| Non-HDL cholesterol                               | 153 | 0.198  | <b>2.11E-11</b> | 0.140  | 0.256  |
| VLDL cholesterol                                  | 153 | 0.477  | <b>6.08E-35</b> | 0.401  | 0.552  |
| IDL cholesterol                                   | 153 | 0.301  | <b>6.32E-20</b> | 0.237  | 0.366  |
| LDL cholesterol                                   | 153 | -0.016 | 0.563           | -0.069 | 0.037  |
| HDL cholesterol                                   | 153 | -0.216 | <b>7.77E-19</b> | -0.264 | -0.169 |
| Cholesterol esterification                        | 146 | 0.116  | <b>3.75E-04</b> | 0.052  | 0.180  |
| <b>Lipoprotein lipid concentration</b>            |     |        |                 |        |        |
| Extremely large VLDL                              | 149 | 0.772  | <b>3.26E-52</b> | 0.673  | 0.872  |
| Very large VLDL                                   | 148 | 0.538  | <b>1.55E-31</b> | 0.448  | 0.629  |
| Large VLDL                                        | 150 | 0.232  | <b>4.09E-08</b> | 0.149  | 0.315  |
| Medium VLDL                                       | 153 | 0.190  | <b>3.36E-07</b> | 0.117  | 0.263  |
| Small VLDL                                        | 153 | 0.131  | <b>9.75E-05</b> | 0.065  | 0.197  |
| Very small VLDL                                   | 153 | 0.270  | <b>9.75E-14</b> | 0.199  | 0.341  |
| IDL                                               | 153 | 0.162  | <b>3.07E-07</b> | 0.100  | 0.224  |
| Large LDL                                         | 153 | 0.000  | 0.988           | -0.056 | 0.056  |
| Medium LDL                                        | 153 | -0.135 | <b>1.22E-06</b> | -0.190 | -0.081 |
| Small LDL                                         | 153 | -0.134 | <b>3.93E-07</b> | -0.185 | -0.082 |
| Very large HDL                                    | 153 | 0.473  | <b>3.71E-76</b> | 0.423  | 0.523  |
| Large HDL                                         | 148 | -0.137 | <b>4.33E-12</b> | -0.176 | -0.098 |
| Medium HDL                                        | 153 | -0.599 | <b>2.58E-43</b> | -0.684 | -0.514 |
| Small HDL                                         | 153 | -0.829 | <b>4.35E-54</b> | -0.934 | -0.724 |

**Supplementary Table S1 (continued)** | Changes in metabolite levels after the standardized liquid meal

|                                       | N   | Change | P-value*        | 95% CI |        |
|---------------------------------------|-----|--------|-----------------|--------|--------|
| <b>Lipoprotein particle size</b>      |     |        |                 |        |        |
| VLDL diameter                         | 153 | 0.235  | <b>1.43E-08</b> | 0.154  | 0.316  |
| LDL diameter                          | 153 | 0.653  | <b>3.47E-32</b> | 0.545  | 0.762  |
| HDL diameter                          | 153 | 0.254  | <b>1.99E-47</b> | 0.219  | 0.288  |
| <b>Apolipoproteins and lipids</b>     |     |        |                 |        |        |
| Triglycerides                         | 153 | -0.021 | 0.563           | -0.091 | 0.050  |
| Total phosphoglyceride                | 146 | -0.104 | <b>7.82E-03</b> | -0.181 | -0.027 |
| Phosphatidylcholines                  | 146 | -0.007 | 0.859           | -0.085 | 0.071  |
| Sphingomyelins                        | 146 | 0.129  | <b>4.58E-04</b> | 0.057  | 0.202  |
| Apolipoprotein A-I                    | 153 | -0.128 | <b>2.53E-04</b> | -0.196 | -0.059 |
| Apolipoprotein B                      | 153 | 0.185  | <b>2.24E-09</b> | 0.125  | 0.246  |
| <b>Glycolysis related metabolites</b> |     |        |                 |        |        |
| Glucose                               | 153 | 0.672  | <b>7.44E-14</b> | 0.496  | 0.848  |
| Lactate                               | 153 | -0.489 | <b>1.52E-05</b> | -0.711 | -0.268 |
| Pyruvate                              | 151 | 0.035  | 0.681           | -0.131 | 0.201  |
| Citrate                               | 153 | -0.074 | 0.408           | -0.251 | 0.102  |
| Glycerol                              | 151 | -1.014 | <b>4.46E-60</b> | -1.135 | -0.892 |
| <b>Amino acids</b>                    |     |        |                 |        |        |
| Alanine                               | 151 | 0.567  | <b>1.94E-19</b> | 0.444  | 0.690  |
| Glutamine                             | 151 | 0.410  | <b>2.51E-11</b> | 0.289  | 0.530  |
| Glycine                               | 135 | -0.468 | <b>1.79E-11</b> | -0.604 | -0.331 |
| Histidine                             | 153 | -0.273 | <b>0.00771</b>  | -0.473 | -0.072 |
| Isoleucine                            | 150 | 0.853  | <b>1.9E-42</b>  | 0.731  | 0.976  |
| Leucine                               | 152 | 1.146  | <b>3.15E-89</b> | 1.034  | 1.258  |
| Valine                                | 151 | 0.506  | <b>7.93E-11</b> | 0.354  | 0.659  |
| Phenylalanine                         | 153 | -0.554 | <b>1.28E-11</b> | -0.714 | -0.394 |
| Tyrosine                              | 153 | -0.165 | 0.093           | -0.358 | 0.027  |
| <b>Ketone bodies</b>                  |     |        |                 |        |        |
| Acetate                               | 153 | -0.452 | <b>1.62E-14</b> | -0.567 | -0.336 |
| Acetoacetate                          | 153 | -0.711 | <b>6.66E-16</b> | -0.884 | -0.538 |
| 3-hydroxybutyrate                     | 151 | 0.227  | <b>3.28E-05</b> | 0.120  | 0.334  |
| <b>Fluid balance</b>                  |     |        |                 |        |        |
| Creatinine                            | 152 | -0.394 | <b>1.55E-10</b> | -0.515 | -0.273 |
| Albumin                               | 153 | -0.294 | <b>0.001</b>    | -0.466 | -0.122 |
| <b>Inflammation markers</b>           |     |        |                 |        |        |
| Glycoprotein acetyls                  | 153 | 0.389  | <b>2.22E-16</b> | 0.296  | 0.483  |

Changes are in units of 1-SD metabolite concentration

\* Bold p-values indicate significant associations after FDR correction

† % of total fatty acids

Double bonds/fatty acids: the number of double bonds in fatty acids. VLDL, very low density lipoprotein; IDL, intermediate density lipoprotein; LDL, low density lipoprotein; HDL, high density lipoprotein.

**Supplementary Table S2** | Effect size of the association between BMI and metabolites before and after the standardized liquid meal

|                                                   | N   | B      | fasting      |        |        | postprandial |              |        |        |
|---------------------------------------------------|-----|--------|--------------|--------|--------|--------------|--------------|--------|--------|
|                                                   |     |        | p-value*     | 95% CI |        | B            | p-value*     | 95% CI |        |
| <b>Fatty acids</b>                                |     |        |              |        |        |              |              |        |        |
| Total fatty acids                                 | 146 | 0.060  | 0.091        | -0.010 | 0.130  | 0.062        | 0.086        | -0.009 | 0.133  |
| Fatty acid chain length                           | 146 | 0.010  | 0.679        | -0.038 | 0.058  | 0.007        | 0.870        | -0.081 | 0.096  |
| Double bonds / fatty acids                        | 146 | -0.025 | 0.430        | -0.088 | 0.038  | -0.059       | 0.171        | -0.144 | 0.026  |
| Docosahexaenoic acid                              | 146 | 0.008  | 0.828        | -0.063 | 0.078  | 0.004        | 0.915        | -0.068 | 0.076  |
| Linoleic acid                                     | 146 | 0.056  | 0.055        | -0.001 | 0.114  | 0.046        | 0.161        | -0.019 | 0.111  |
| Omega-3 fatty acids                               | 146 | 0.017  | 0.640        | -0.055 | 0.089  | 0.017        | 0.643        | -0.056 | 0.090  |
| Omega-6 fatty acids                               | 146 | 0.050  | 0.114        | -0.012 | 0.112  | 0.038        | 0.261        | -0.029 | 0.105  |
| Polyunsaturated fatty acids                       | 146 | 0.048  | 0.130        | -0.014 | 0.111  | 0.037        | 0.282        | -0.031 | 0.105  |
| Monounsaturated fatty acids                       | 146 | 0.088  | 0.016        | 0.017  | 0.160  | 0.100        | <b>0.005</b> | 0.031  | 0.168  |
| Saturated fatty acids                             | 146 | 0.035  | 0.304        | -0.032 | 0.101  | 0.040        | 0.298        | -0.036 | 0.115  |
| <b>Fatty acids, relative to total fatty acids</b> |     |        |              |        |        |              |              |        |        |
| Omega-3 fatty acids (%) <sup>†</sup>              | 146 | -0.032 | 0.371        | -0.102 | 0.038  | -0.034       | 0.384        | -0.110 | 0.043  |
| Omega-6 fatty acids (%) <sup>†</sup>              | 146 | -0.027 | 0.396        | -0.089 | 0.036  | -0.054       | 0.096        | -0.117 | 0.010  |
| Polyunsaturated fatty acids (%) <sup>†</sup>      | 146 | -0.034 | 0.273        | -0.095 | 0.027  | -0.060       | 0.089        | -0.129 | 0.009  |
| Monounsaturated fatty acids (%) <sup>†</sup>      | 146 | 0.093  | <b>0.002</b> | 0.034  | 0.153  | 0.114        | <b>0.001</b> | 0.050  | 0.177  |
| Saturated fatty acids (%) <sup>†</sup>            | 146 | -0.070 | <b>0.006</b> | -0.119 | -0.020 | -0.059       | 0.218        | -0.153 | 0.035  |
| <b>Cholesterol</b>                                |     |        |              |        |        |              |              |        |        |
| Total cholesterol                                 | 153 | 0.016  | 0.628        | -0.049 | 0.081  | -0.003       | 0.926        | -0.070 | 0.064  |
| Non-HDL cholesterol                               | 153 | 0.060  | 0.064        | -0.003 | 0.123  | 0.041        | 0.197        | -0.022 | 0.104  |
| VLDL cholesterol                                  | 153 | 0.098  | <b>0.004</b> | 0.033  | 0.163  | 0.083        | <b>0.005</b> | 0.025  | 0.140  |
| IDL cholesterol                                   | 153 | 0.023  | 0.493        | -0.043 | 0.089  | 0.014        | 0.670        | -0.051 | 0.079  |
| LDL cholesterol                                   | 153 | 0.044  | 0.158        | -0.017 | 0.104  | 0.018        | 0.580        | -0.046 | 0.082  |
| HDL cholesterol                                   | 153 | -0.094 | <b>0.008</b> | -0.163 | -0.025 | -0.113       | <b>0.003</b> | -0.186 | -0.040 |
| Cholesterol esterification                        | 146 | 0.018  | 0.600        | -0.050 | 0.086  | -0.001       | 0.976        | -0.069 | 0.067  |



**Supplementary Table S2 (continued)** | Effect size of the association between BMI and metabolites before and after the standardized liquid meal

|                                        | N   | B      | fasting         |        | postprandial |          |                 |        |        |
|----------------------------------------|-----|--------|-----------------|--------|--------------|----------|-----------------|--------|--------|
|                                        |     |        | p-value*        | 95% CI | B            | p-value* | 95% CI          |        |        |
| <b>Lipoprotein lipid concentration</b> |     |        |                 |        |              |          |                 |        |        |
| Extremely large VLDL                   | 149 | 0.064  | 0.073           | -0.006 | 0.134        | 0.116    | <b>0.010</b>    | 0.028  | 0.204  |
| Very large VLDL                        | 148 | 0.078  | 0.051           | 0.000  | 0.157        | 0.117    | <b>0.006</b>    | 0.034  | 0.199  |
| Large VLDL                             | 150 | 0.113  | <b>0.006</b>    | 0.034  | 0.192        | 0.122    | <b>0.001</b>    | 0.052  | 0.193  |
| Medium VLDL                            | 153 | 0.138  | <b>8.81E-05</b> | 0.071  | 0.205        | 0.122    | <b>4.73E-05</b> | 0.065  | 0.178  |
| Small VLDL                             | 153 | 0.123  | <b>3.59E-04</b> | 0.057  | 0.190        | 0.107    | <b>3.90E-04</b> | 0.049  | 0.164  |
| Very small VLDL                        | 153 | 0.066  | 0.059           | -0.003 | 0.134        | 0.048    | 0.138           | -0.016 | 0.112  |
| IDL                                    | 153 | 0.028  | 0.420           | -0.040 | 0.096        | 0.016    | 0.643           | -0.053 | 0.085  |
| Large LDL                              | 153 | 0.038  | 0.249           | -0.027 | 0.102        | 0.019    | 0.588           | -0.049 | 0.087  |
| Medium LDL                             | 153 | 0.051  | 0.099           | -0.010 | 0.111        | 0.023    | 0.499           | -0.043 | 0.089  |
| Small LDL                              | 153 | 0.052  | 0.086           | -0.007 | 0.111        | 0.024    | 0.463           | -0.040 | 0.088  |
| Very large HDL                         | 153 | -0.110 | <b>0.001</b>    | -0.172 | -0.047       | -0.092   | <b>0.001</b>    | -0.146 | -0.038 |
| Large HDL                              | 148 | -0.107 | <b>0.001</b>    | -0.168 | -0.047       | -0.114   | <b>2.95E-04</b> | -0.174 | -0.054 |
| Medium HDL                             | 153 | -0.034 | 0.361           | -0.109 | 0.040        | -0.051   | 0.176           | -0.126 | 0.023  |
| Small HDL                              | 153 | 0.043  | 0.196           | -0.022 | 0.108        | 0.003    | 0.928           | -0.070 | 0.076  |
| <b>Lipoprotein particle size</b>       |     |        |                 |        |              |          |                 |        |        |
| VLDL diameter                          | 153 | 0.132  | <b>2.43E-04</b> | 0.063  | 0.200        | 0.132    | <b>3.16E-05</b> | 0.072  | 0.192  |
| LDL diameter                           | 153 | -0.062 | 0.024           | -0.115 | -0.008       | -0.021   | 0.419           | -0.072 | 0.030  |
| HDL diameter                           | 153 | -0.119 | <b>1.35E-04</b> | -0.178 | -0.059       | -0.113   | <b>1.40E-04</b> | -0.169 | -0.056 |
| <b>Apolipoproteins and lipids</b>      |     |        |                 |        |              |          |                 |        |        |
| Triglycerides                          | 153 | 0.125  | <b>3.89E-04</b> | 0.058  | 0.193        | 0.126    | <b>6.58E-05</b> | 0.066  | 0.187  |
| Total phosphoglyceride                 | 146 | -0.006 | 0.862           | -0.079 | 0.067        | -0.016   | 0.663           | -0.088 | 0.056  |
| Phosphatidylcholines                   | 146 | -0.008 | 0.833           | -0.078 | 0.063        | -0.022   | 0.549           | -0.093 | 0.050  |
| Sphingomyelins                         | 146 | -0.028 | 0.383           | -0.092 | 0.035        | -0.058   | 0.100           | -0.128 | 0.011  |
| Apolipoprotein A-I                     | 153 | -0.066 | 0.046           | -0.131 | -0.001       | -0.086   | 0.017           | -0.157 | -0.016 |
| Apolipoprotein B                       | 153 | 0.083  | <b>0.013</b>    | 0.018  | 0.149        | 0.068    | 0.038           | 0.004  | 0.132  |

**Supplementary Table S2 (continued)** | Effect size of the association between BMI and metabolites before and after the standardized liquid meal

|                                       | N   | B      | fasting      |        |       | postprandial |              |        |       |
|---------------------------------------|-----|--------|--------------|--------|-------|--------------|--------------|--------|-------|
|                                       |     |        | p-value*     | 95% CI |       | B            | p-value*     | 95% CI |       |
| <b>Glycolysis related metabolites</b> |     |        |              |        |       |              |              |        |       |
| Glucose                               | 153 | 0.037  | 0.050        | 0.000  | 0.074 | 0.057        | 0.133        | -0.018 | 0.132 |
| Lactate                               | 153 | 0.092  | <b>0.001</b> | 0.041  | 0.143 | 0.019        | 0.659        | -0.066 | 0.103 |
| Pyruvate                              | 151 | 0.063  | 0.047        | 0.001  | 0.125 | 0.023        | 0.485        | -0.043 | 0.090 |
| Citrate                               | 153 | 0.043  | 0.167        | -0.018 | 0.103 | 0.026        | 0.484        | -0.047 | 0.098 |
| Glycerol                              | 151 | 0.060  | <b>0.001</b> | 0.024  | 0.095 | 0.089        | <b>0.002</b> | 0.034  | 0.145 |
| <b>Amino acids</b>                    |     |        |              |        |       |              |              |        |       |
| Alanine                               | 151 | 0.030  | 0.319        | -0.030 | 0.091 | -0.029       | 0.475        | -0.110 | 0.052 |
| Glutamine                             | 151 | -0.047 | 0.159        | -0.112 | 0.019 | -0.069       | 0.056        | -0.140 | 0.002 |
| Glycine                               | 135 | -0.037 | 0.177        | -0.092 | 0.017 | -0.041       | 0.240        | -0.110 | 0.028 |
| Histidine                             | 153 | -0.016 | 0.575        | -0.071 | 0.040 | -0.038       | 0.219        | -0.099 | 0.023 |
| Isoleucine                            | 150 | 0.072  | 0.023        | 0.010  | 0.133 | 0.031        | 0.308        | -0.029 | 0.092 |
| Leucine                               | 152 | 0.053  | 0.024        | 0.007  | 0.099 | 0.018        | 0.518        | -0.038 | 0.074 |
| Valine                                | 151 | 0.036  | 0.262        | -0.027 | 0.099 | 0.003        | 0.939        | -0.072 | 0.078 |
| Phenylalanine                         | 153 | 0.089  | <b>0.006</b> | 0.026  | 0.153 | 0.045        | 0.224        | -0.028 | 0.118 |
| Tyrosine                              | 153 | 0.075  | <b>0.011</b> | 0.017  | 0.133 | 0.044        | 0.226        | -0.027 | 0.114 |
| <b>Ketone bodies</b>                  |     |        |              |        |       |              |              |        |       |
| Acetate                               | 153 | 0.033  | 0.470        | -0.058 | 0.124 | -0.005       | 0.896        | -0.079 | 0.069 |
| Acetoacetate                          | 153 | 0.014  | 0.654        | -0.047 | 0.075 | 0.028        | 0.469        | -0.048 | 0.104 |
| 3-hydroxybutyrate                     | 151 | 0.061  | 0.029        | 0.006  | 0.116 | 0.038        | 0.191        | -0.019 | 0.094 |
| <b>Fluid balance</b>                  |     |        |              |        |       |              |              |        |       |
| Creatinine                            | 152 | -0.021 | 0.504        | -0.083 | 0.041 | -0.021       | 0.536        | -0.088 | 0.046 |
| Albumin                               | 153 | 0.000  | 0.993        | -0.059 | 0.058 | -0.042       | 0.312        | -0.125 | 0.040 |
| <b>Inflammation markers</b>           |     |        |              |        |       |              |              |        |       |
| Glycoprotein acetyls                  | 153 | 0.117  | <b>0.001</b> | 0.051  | 0.183 | 0.115        | <b>0.001</b> | 0.046  | 0.184 |

Effect sizes indicate the association magnitudes in units of 1-SD metabolite concentration per 1-kg/m<sup>2</sup> increment in BMI

\* **Bold p-values** indicate significant associations after FDR correction. <sup>†</sup> % of total fatty acids

Double bonds/fatty acids: the number of double bonds in fatty acids. VLDL, very low density lipoprotein; IDL, intermediate density lipoprotein; LDL, low density lipoprotein; HDL, high density lipoprotein.

**Supplementary Table S3** | Effect size of the association between BMI and metabolites in this study and study done by Würtz *et al.* (2014)<sup>1</sup>

|                                                   | GOTO   |       |                 | Würtz  |       |                  |
|---------------------------------------------------|--------|-------|-----------------|--------|-------|------------------|
|                                                   | B      | SE    | p-value         | B      | SE    | p-value          |
| <b>Fatty acids</b>                                |        |       |                 |        |       |                  |
| Total fatty acids                                 | 0.060  | 0.035 | 0.091           | 0.060  | 0.003 | <b>1.74E-71</b>  |
| Fatty acid chain length                           | 0.010  | 0.024 | 0.679           | -0.016 | 0.006 | 6.70E-03         |
| Double bonds / fatty acids                        | -0.025 | 0.032 | 0.430           | -0.033 | 0.004 | <b>8.51E-17</b>  |
| Docosahexaenoic acid                              | 0.008  | 0.035 | 0.828           | 0.026  | 0.005 | <b>3.90E-07</b>  |
| Linoleic acid                                     | 0.056  | 0.029 | 0.055           | 0.025  | 0.004 | <b>3.24E-10</b>  |
| Omega-3 fatty acids                               | 0.017  | 0.036 | 0.640           | 0.040  | 0.006 | <b>9.50E-13</b>  |
| Omega-6 fatty acids                               | 0.050  | 0.031 | 0.114           | 0.035  | 0.005 | <b>5.36E-14</b>  |
| Polyunsaturated fatty acids                       | 0.048  | 0.032 | 0.130           | 0.038  | 0.005 | <b>5.83E-15</b>  |
| Monounsaturated fatty acids                       | 0.088  | 0.036 | 0.016           | 0.070  | 0.003 | <b>2.37E-145</b> |
| Saturated fatty acids                             | 0.035  | 0.033 | 0.304           | 0.058  | 0.003 | <b>2.52E-102</b> |
| <b>Fatty acids, relative to total fatty acids</b> |        |       |                 |        |       |                  |
| Omega-3 fatty acids (%) <sup>†</sup>              | -0.032 | 0.035 | 0.371           | -0.005 | 0.004 | 0.135            |
| Omega-6 fatty acids (%) <sup>†</sup>              | -0.027 | 0.032 | 0.396           | -0.064 | 0.003 | <b>1.03E-117</b> |
| Polyunsaturated fatty acids (%) <sup>†</sup>      | -0.034 | 0.031 | 0.273           | -0.064 | 0.004 | <b>1.13E-71</b>  |
| Monounsaturated fatty acids (%) <sup>†</sup>      | 0.093  | 0.030 | <b>0.002</b>    | 0.059  | 0.002 | <b>1.88E-159</b> |
| Saturated fatty acids (%) <sup>†</sup>            | -0.070 | 0.025 | <b>0.006</b>    | 0.013  | 0.004 | 8.95E-04         |
| <b>Cholesterol</b>                                |        |       |                 |        |       |                  |
| Total cholesterol                                 | 0.016  | 0.033 | 0.628           | 0.036  | 0.003 | <b>2.58E-30</b>  |
| non HDL cholesterol                               | 0.060  | 0.032 | 0.064           | 0.060  | 0.003 | <b>3.07E-107</b> |
| VLDL cholesterol                                  | 0.098  | 0.033 | <b>0.004</b>    | 0.069  | 0.003 | <b>8.41E-110</b> |
| IDL cholesterol                                   | 0.023  | 0.033 | 0.493           | 0.043  | 0.003 | <b>7.44E-49</b>  |
| LDL cholesterol                                   | 0.044  | 0.031 | 0.158           | 0.053  | 0.002 | <b>1.47E-116</b> |
| HDL cholesterol                                   | -0.094 | 0.035 | <b>0.008</b>    | -0.052 | 0.002 | <b>1.72E-133</b> |
| Cholesterol esterification                        | 0.018  | 0.034 | 0.600           | 0.014  | 0.003 | <b>2.17E-05</b>  |
| <b>Lipoprotein lipid concentration</b>            |        |       |                 |        |       |                  |
| Extremely large VLDL                              | 0.064  | 0.035 | 0.073           | 0.077  | 0.002 | <b>8.74E-287</b> |
| Very large VLDL                                   | 0.078  | 0.040 | 0.051           | 0.078  | 0.002 | <b>2.43E-231</b> |
| Large VLDL                                        | 0.113  | 0.040 | <b>0.006</b>    | 0.081  | 0.002 | <b>3.66E-294</b> |
| Medium VLDL                                       | 0.138  | 0.034 | <b>8.81E-05</b> | 0.081  | 0.003 | <b>4.68E-163</b> |
| Small VLDL                                        | 0.123  | 0.033 | <b>3.59E-04</b> | 0.081  | 0.004 | <b>2.95E-114</b> |
| Very small VLDL                                   | 0.066  | 0.034 | 0.059           | 0.064  | 0.002 | <b>1.15E-188</b> |
| IDL                                               | 0.028  | 0.034 | 0.420           | 0.051  | 0.003 | <b>1.24E-90</b>  |
| Large LDL                                         | 0.038  | 0.033 | 0.249           | 0.052  | 0.002 | <b>6.12E-120</b> |
| Medium LDL                                        | 0.051  | 0.030 | 0.099           | 0.056  | 0.002 | <b>4.25E-149</b> |
| Small LDL                                         | 0.052  | 0.030 | 0.086           | 0.065  | 0.002 | <b>2.20E-202</b> |
| Very large HDL                                    | -0.110 | 0.031 | <b>0.001</b>    | -0.037 | 0.013 | 5.49E-03         |
| Large HDL                                         | -0.107 | 0.030 | <b>0.001</b>    | -0.068 | 0.002 | <b>3.93E-185</b> |
| Medium HDL                                        | -0.034 | 0.038 | 0.361           | -0.018 | 0.010 | 0.079            |
| Small HDL                                         | 0.043  | 0.033 | 0.196           | 0.017  | 0.012 | 0.151            |

**Supplementary Table S3 (continued)** | Effect size of the association between BMI and metabolites in this study and study done by Würtz *et al.* (2014)<sup>1</sup>

|                                       | GOTO   |       |                 | Würtz  |       |                  |
|---------------------------------------|--------|-------|-----------------|--------|-------|------------------|
|                                       | B      | SE    | p-value         | B      | SE    | p-value          |
| <b>Lipoprotein particle size</b>      |        |       |                 |        |       |                  |
| VLDL diameter                         | 0.132  | 0.035 | <b>2.43E-04</b> | 0.065  | 0.002 | <b>3.74E-206</b> |
| LDL diameter                          | -0.062 | 0.027 | 0.024           | -0.027 | 0.003 | <b>2.38E-21</b>  |
| HDL diameter                          | -0.119 | 0.030 | <b>1.35E-04</b> | -0.064 | 0.009 | <b>1.33E-11</b>  |
| <b>Apolipoproteins and lipids</b>     |        |       |                 |        |       |                  |
| Triglycerides                         | 0.125  | 0.034 | <b>3.89E-04</b> | 0.087  | 0.002 | <b>0</b>         |
| Total phosphoglyceride                | -0.006 | 0.037 | 0.862           | 0.020  | 0.003 | <b>5.14E-12</b>  |
| Phosphatidylcholines                  | -0.008 | 0.036 | 0.833           | 0.013  | 0.003 | <b>2.54E-06</b>  |
| Sphingomyelins                        | -0.028 | 0.032 | 0.383           | 0.029  | 0.003 | <b>3.03E-30</b>  |
| Apolipoprotein A-I                    | -0.066 | 0.033 | 0.046           | -0.022 | 0.003 | <b>2.27E-14</b>  |
| Apolipoprotein B                      | 0.083  | 0.033 | <b>0.013</b>    | 0.073  | 0.003 | <b>3.68E-100</b> |
| <b>Glycolysis related metabolites</b> |        |       |                 |        |       |                  |
| Glucose                               | 0.037  | 0.019 | 0.050           | 0.015  | 0.004 | <b>1.97E-05</b>  |
| Lactate                               | 0.092  | 0.026 | <b>0.001</b>    | 0.019  | 0.003 | <b>2.59E-10</b>  |
| Pyruvate                              | 0.063  | 0.031 | 0.047           | 0.028  | 0.005 | <b>2.17E-08</b>  |
| Citrate                               | 0.043  | 0.031 | 0.167           | -0.024 | 0.006 | <b>2.32E-05</b>  |
| Glycerol                              | 0.060  | 0.018 | <b>0.001</b>    | 0.046  | 0.007 | <b>5.88E-11</b>  |
| <b>Amino acids</b>                    |        |       |                 |        |       |                  |
| Alanine                               | 0.030  | 0.030 | 0.319           | 0.039  | 0.004 | <b>1.06E-24</b>  |
| Glutamine                             | -0.047 | 0.033 | 0.159           | -0.028 | 0.005 | <b>1.08E-07</b>  |
| Glycine                               | -0.037 | 0.027 | 0.177           | -0.012 | 0.004 | <b>5.38E-04</b>  |
| Histidine                             | -0.016 | 0.028 | 0.575           | 0.012  | 0.007 | 0.100            |
| Isoleucine                            | 0.072  | 0.031 | 0.023           | 0.070  | 0.003 | <b>1.92E-105</b> |
| Leucine                               | 0.053  | 0.023 | 0.024           | 0.067  | 0.002 | <b>7.12E-249</b> |
| Valine                                | 0.036  | 0.032 | 0.262           | 0.058  | 0.002 | <b>3.70E-164</b> |
| Phenylalanine                         | 0.089  | 0.032 | <b>0.006</b>    | 0.079  | 0.002 | <b>2.00E-292</b> |
| Tyrosine                              | 0.075  | 0.029 | <b>0.011</b>    | 0.061  | 0.004 | <b>1.12E-60</b>  |
| <b>Ketone bodies</b>                  |        |       |                 |        |       |                  |
| Acetate                               | 0.033  | 0.046 | 0.470           | -0.018 | 0.002 | <b>1.92E-14</b>  |
| Acetoacetate                          | 0.014  | 0.031 | 0.654           | -0.013 | 0.002 | <b>3.02E-08</b>  |
| 3-hydroxybutyrate                     | 0.061  | 0.028 | 0.029           | -0.018 | 0.002 | <b>5.20E-15</b>  |
| <b>Fluid balance</b>                  |        |       |                 |        |       |                  |
| Creatinine                            | -0.021 | 0.031 | 0.504           | 0.002  | 0.007 | 0.776            |
| Albumin                               | 0.000  | 0.030 | 0.993           | -0.006 | 0.005 | 0.196            |
| <b>Inflammation markers</b>           |        |       |                 |        |       |                  |
| Glycoprotein acetyls                  | 0.117  | 0.033 | <b>0.001</b>    | 0.078  | 0.005 | <b>4.67E-53</b>  |

Effect sizes indicate the association magnitudes in units of 1-SD metabolite concentration per 1-kg/m<sup>2</sup> increment in BMI

\* Bold p-values indicate significant associations after FDR correction. # Bold p-values indicate significant associations after Bonferroni correction. † % of total fatty acids

Double bonds/fatty acids: the number of double bonds in fatty acids. VLDL. very low density lipoprotein; IDL. intermediate density lipoprotein; LDL. low density lipoprotein; HDL. high density lipoprotein.

**Supplementary Table S4** | Interaction between SLM and BMI

|                                                   | BMI |        |              |        |        | SLM x BMI |          |        |        | SLM    |          |        |        |
|---------------------------------------------------|-----|--------|--------------|--------|--------|-----------|----------|--------|--------|--------|----------|--------|--------|
|                                                   | N   | B      | p-value*     | 95% CI |        | B         | p-value* | 95% CI |        | B      | p-value* | 95% CI |        |
| <b>Fatty acids</b>                                |     |        |              |        |        |           |          |        |        |        |          |        |        |
| Total fatty acids                                 | 146 | 0.060  | 0.089        | -0.009 | 0.130  | 0.002     | 0.919    | -0.034 | 0.037  | 0.121  | 0.808    | -0.861 | 1.103  |
| Fatty acid chain length                           | 146 | 0.021  | 0.385        | -0.027 | 0.070  | -0.026    | 0.631    | -0.131 | 0.080  | 1.099  | 0.453    | -1.794 | 3.992  |
| Double bonds / fatty acids                        | 146 | -0.030 | 0.343        | -0.092 | 0.032  | -0.024    | 0.454    | -0.088 | 0.040  | 0.581  | 0.513    | -1.178 | 2.340  |
| Docosahexaenoic acid                              | 146 | 0.008  | 0.828        | -0.062 | 0.078  | -0.004    | 0.716    | -0.024 | 0.017  | 0.184  | 0.519    | -0.381 | 0.749  |
| Linoleic acid                                     | 146 | 0.055  | 0.060        | -0.002 | 0.113  | -0.008    | 0.591    | -0.036 | 0.021  | 0.305  | 0.442    | -0.479 | 1.089  |
| Omega-3 fatty acids                               | 146 | 0.015  | 0.671        | -0.056 | 0.087  | 0.003     | 0.802    | -0.022 | 0.029  | 0.048  | 0.891    | -0.645 | 0.740  |
| Omega-6 fatty acids                               | 146 | 0.047  | 0.135        | -0.015 | 0.109  | -0.006    | 0.708    | -0.039 | 0.026  | 0.258  | 0.566    | -0.630 | 1.145  |
| Polyunsaturated fatty acids                       | 146 | 0.045  | 0.154        | -0.017 | 0.108  | -0.005    | 0.748    | -0.038 | 0.028  | 0.248  | 0.585    | -0.650 | 1.146  |
| Monounsaturated fatty acids                       | 146 | 0.086  | 0.018        | 0.015  | 0.157  | 0.015     | 0.312    | -0.015 | 0.046  | -0.329 | 0.432    | -1.159 | 0.500  |
| Saturated fatty acids                             | 146 | 0.039  | 0.249        | -0.027 | 0.105  | -0.003    | 0.920    | -0.056 | 0.050  | 0.314  | 0.674    | -1.161 | 1.788  |
| <b>Fatty acids, relative to total fatty acids</b> |     |        |              |        |        |           |          |        |        |        |          |        |        |
| Omega-3 fatty acids (%) <sup>†</sup>              | 146 | -0.034 | 0.339        | -0.104 | 0.036  | 0.002     | 0.853    | -0.023 | 0.028  | -0.049 | 0.891    | -0.754 | 0.656  |
| Omega-6 fatty acids (%) <sup>†</sup>              | 146 | -0.033 | 0.301        | -0.095 | 0.030  | -0.015    | 0.615    | -0.075 | 0.045  | 0.240  | 0.773    | -1.410 | 1.890  |
| Polyunsaturated fatty acids (%) <sup>†</sup>      | 146 | -0.040 | 0.195        | -0.100 | 0.021  | -0.014    | 0.647    | -0.077 | 0.048  | 0.229  | 0.792    | -1.490 | 1.947  |
| Monounsaturated fatty acids (%) <sup>†</sup>      | 146 | 0.089  | <b>0.004</b> | 0.030  | 0.148  | 0.029     | 0.058    | -0.001 | 0.058  | -0.834 | 0.044    | -1.647 | -0.022 |
| Saturated fatty acids (%) <sup>†</sup>            | 146 | -0.057 | 0.024        | -0.107 | -0.008 | -0.014    | 0.770    | -0.106 | 0.078  | 0.622  | 0.628    | -1.917 | 3.161  |
| <b>Cholesterol</b>                                |     |        |              |        |        |           |          |        |        |        |          |        |        |
| Total cholesterol                                 | 153 | 0.015  | 0.647        | -0.050 | 0.080  | -0.017    | 0.194    | -0.044 | 0.009  | 0.579  | 0.107    | -0.128 | 1.286  |
| non-HDL cholesterol                               | 153 | 0.058  | 0.070        | -0.005 | 0.121  | -0.015    | 0.211    | -0.039 | 0.009  | 0.600  | 0.064    | -0.037 | 1.237  |
| VLDL cholesterol                                  | 153 | 0.095  | <b>0.004</b> | 0.030  | 0.159  | -0.009    | 0.580    | -0.040 | 0.022  | 0.711  | 0.105    | -0.152 | 1.575  |
| IDL cholesterol                                   | 153 | 0.022  | 0.505        | -0.044 | 0.089  | -0.008    | 0.569    | -0.036 | 0.020  | 0.516  | 0.173    | -0.231 | 1.262  |
| LDL cholesterol                                   | 153 | 0.043  | 0.163        | -0.018 | 0.103  | -0.024    | 0.032    | -0.045 | -0.002 | 0.621  | 0.035    | 0.044  | 1.199  |
| HDL cholesterol                                   | 153 | -0.093 | <b>0.009</b> | -0.162 | -0.024 | -0.021    | 0.021    | -0.039 | -0.003 | 0.345  | 0.163    | -0.142 | 0.833  |
| Cholesterol esterification                        | 146 | 0.017  | 0.627        | -0.051 | 0.084  | -0.016    | 0.226    | -0.043 | 0.010  | 0.556  | 0.131    | -0.168 | 1.280  |

**Supplementary Table S4 (continued)** | Interaction between SLM and BMI

|                                        | BMI |        |                 |        |        | BMI x SLM |          |        |        | SLM    |          |        |       |
|----------------------------------------|-----|--------|-----------------|--------|--------|-----------|----------|--------|--------|--------|----------|--------|-------|
|                                        | N   | B      | p-value*        | 95% CI |        | B         | p-value* | 95% CI |        | B      | p-value* | 95% CI |       |
| <b>Lipoprotein lipid concentration</b> |     |        |                 |        |        |           |          |        |        |        |          |        |       |
| Extremely large VLDL                   | 149 | 0.062  | 0.080           | -0.008 | 0.132  | 0.056     | 0.006    | 0.016  | 0.096  | -0.741 | 0.176    | -1.820 | 0.338 |
| Very large VLDL                        | 148 | 0.076  | 0.054           | -0.001 | 0.153  | 0.043     | 0.010    | 0.010  | 0.075  | -0.613 | 0.174    | -1.501 | 0.275 |
| Large VLDL                             | 150 | 0.110  | <b>0.006</b>    | 0.032  | 0.188  | 0.015     | 0.290    | -0.013 | 0.044  | -0.184 | 0.649    | -0.982 | 0.615 |
| Medium VLDL                            | 153 | 0.134  | <b>1.21E-04</b> | 0.067  | 0.200  | -0.008    | 0.579    | -0.035 | 0.020  | 0.396  | 0.297    | -0.355 | 1.148 |
| Small VLDL                             | 153 | 0.119  | <b>4.96E-04</b> | 0.054  | 0.185  | -0.008    | 0.507    | -0.033 | 0.016  | 0.354  | 0.300    | -0.321 | 1.029 |
| Very small VLDL                        | 153 | 0.063  | 0.069           | -0.005 | 0.132  | -0.013    | 0.402    | -0.043 | 0.017  | 0.613  | 0.141    | -0.208 | 1.434 |
| IDL                                    | 153 | 0.027  | 0.439           | -0.042 | 0.095  | -0.009    | 0.477    | -0.036 | 0.017  | 0.417  | 0.245    | -0.291 | 1.124 |
| Large LDL                              | 153 | 0.036  | 0.263           | -0.028 | 0.101  | -0.017    | 0.155    | -0.039 | 0.006  | 0.444  | 0.154    | -0.170 | 1.058 |
| Medium LDL                             | 153 | 0.049  | 0.103           | -0.010 | 0.109  | -0.026    | 0.030    | -0.049 | -0.002 | 0.554  | 0.077    | -0.062 | 1.171 |
| Small LDL                              | 153 | 0.051  | 0.088           | -0.008 | 0.109  | -0.026    | 0.020    | -0.048 | -0.004 | 0.563  | 0.055    | -0.012 | 1.138 |
| Very large HDL                         | 153 | -0.109 | <b>0.001</b>    | -0.171 | -0.047 | 0.016     | 0.184    | -0.008 | 0.039  | 0.047  | 0.883    | -0.591 | 0.686 |
| Large HDL                              | 148 | -0.107 | <b>0.001</b>    | -0.168 | -0.046 | -0.007    | 0.344    | -0.022 | 0.008  | 0.058  | 0.782    | -0.358 | 0.474 |
| Medium HDL                             | 153 | -0.035 | 0.362           | -0.109 | 0.040  | -0.017    | 0.326    | -0.050 | 0.017  | -0.151 | 0.745    | -1.072 | 0.770 |
| Small HDL                              | 153 | 0.045  | 0.168           | -0.019 | 0.110  | -0.045    | 0.028    | -0.084 | -0.005 | 0.369  | 0.504    | -0.724 | 1.463 |
| <b>Lipoprotein particle size</b>       |     |        |                 |        |        |           |          |        |        |        |          |        |       |
| VLDL diameter                          | 153 | 0.128  | <b>2.83E-04</b> | 0.061  | 0.196  | 0.007     | 0.640    | -0.023 | 0.038  | 0.039  | 0.926    | -0.803 | 0.882 |
| LDL diameter                           | 153 | -0.062 | 0.024           | -0.116 | -0.008 | 0.042     | 0.116    | -0.010 | 0.094  | -0.471 | 0.505    | -1.868 | 0.927 |
| HDL diameter                           | 153 | -0.120 | <b>1.12E-04</b> | -0.179 | -0.061 | 0.008     | 0.291    | -0.007 | 0.023  | 0.038  | 0.855    | -0.372 | 0.448 |
| <b>Apolipoproteins and lipids</b>      |     |        |                 |        |        |           |          |        |        |        |          |        |       |
| Triglycerides                          | 153 | 0.121  | <b>0.001</b>    | 0.054  | 0.187  | 0.010     | 0.455    | -0.016 | 0.036  | -0.288 | 0.426    | -1.003 | 0.427 |
| Total phosphoglyceride                 | 146 | -0.008 | 0.826           | -0.081 | 0.065  | -0.006    | 0.713    | -0.039 | 0.027  | 0.059  | 0.897    | -0.839 | 0.956 |
| Phosphatidylcholines                   | 146 | -0.009 | 0.800           | -0.080 | 0.062  | -0.011    | 0.496    | -0.044 | 0.021  | 0.293  | 0.514    | -0.596 | 1.183 |
| Sphingomyelins                         | 146 | -0.030 | 0.353           | -0.094 | 0.034  | -0.026    | 0.115    | -0.059 | 0.007  | 0.840  | 0.066    | -0.057 | 1.736 |
| Apolipoprotein A-I                     | 153 | -0.065 | 0.049           | -0.131 | 0.000  | -0.022    | 0.124    | -0.050 | 0.006  | 0.462  | 0.238    | -0.311 | 1.236 |
| Apolipoprotein B                       | 153 | 0.081  | 0.015           | 0.016  | 0.145  | -0.010    | 0.384    | -0.034 | 0.013  | 0.468  | 0.154    | -0.179 | 1.114 |

**Supplementary Table S4 (continued) | Interaction between SLM and BMI**

|                                       | BMI |        |                 |        |       | SLM x BMI |          |        |       | SLM    |          |        |        |
|---------------------------------------|-----|--------|-----------------|--------|-------|-----------|----------|--------|-------|--------|----------|--------|--------|
|                                       | N   | B      | p-value*        | 95% CI |       | B         | p-value* | 95% CI |       | B      | p-value* | 95% CI |        |
| <b>Glycolysis related metabolites</b> |     |        |                 |        |       |           |          |        |       |        |          |        |        |
| Glucose                               | 153 | 0.031  | 0.146           | -0.011 | 0.074 | 0.031     | 0.339    | -0.033 | 0.096 | -0.174 | 0.849    | -1.983 | 1.634  |
| Lactate                               | 153 | 0.085  | <b>0.001</b>    | 0.034  | 0.135 | -0.058    | 0.179    | -0.144 | 0.027 | 1.081  | 0.359    | -1.248 | 3.410  |
| Pyruvate                              | 151 | 0.057  | 0.082           | -0.007 | 0.121 | -0.027    | 0.425    | -0.094 | 0.040 | 0.763  | 0.398    | -1.022 | 2.547  |
| Citrate                               | 153 | 0.045  | 0.141           | -0.015 | 0.104 | -0.021    | 0.573    | -0.095 | 0.053 | 0.492  | 0.630    | -1.533 | 2.517  |
| Glycerol                              | 151 | 0.065  | <b>4.77E-04</b> | 0.029  | 0.100 | 0.020     | 0.453    | -0.033 | 0.073 | -1.551 | 0.038    | -3.013 | -0.089 |
| <b>Amino acids</b>                    |     |        |                 |        |       |           |          |        |       |        |          |        |        |
| Alanine                               | 151 | 0.027  | 0.383           | -0.034 | 0.088 | -0.053    | 0.056    | -0.107 | 0.001 | 1.992  | 0.007    | 0.557  | 3.428  |
| Glutamine                             | 151 | -0.044 | 0.176           | -0.108 | 0.020 | -0.028    | 0.362    | -0.089 | 0.033 | 1.164  | 0.161    | -0.472 | 2.800  |
| Glycine                               | 135 | -0.036 | 0.224           | -0.094 | 0.022 | -0.007    | 0.812    | -0.064 | 0.050 | -0.285 | 0.719    | -1.849 | 1.280  |
| Histidine                             | 153 | -0.011 | 0.680           | -0.065 | 0.043 | -0.031    | 0.441    | -0.110 | 0.048 | 0.561  | 0.613    | -1.631 | 2.753  |
| Isoleucine                            | 150 | 0.064  | 0.040           | 0.003  | 0.126 | -0.026    | 0.319    | -0.077 | 0.025 | 1.549  | 0.030    | 0.151  | 2.946  |
| Leucine                               | 152 | 0.047  | 0.050           | 0.000  | 0.095 | -0.023    | 0.356    | -0.073 | 0.026 | 1.769  | 0.011    | 0.423  | 3.116  |
| Valine                                | 151 | 0.030  | 0.349           | -0.034 | 0.094 | -0.022    | 0.449    | -0.079 | 0.035 | 1.097  | 0.168    | -0.469 | 2.664  |
| Phenylalanine                         | 153 | 0.081  | 0.013           | 0.018  | 0.145 | -0.028    | 0.424    | -0.099 | 0.042 | 0.212  | 0.826    | -1.698 | 2.122  |
| Tyrosine                              | 153 | 0.071  | 0.021           | 0.011  | 0.131 | -0.023    | 0.548    | -0.097 | 0.052 | 0.445  | 0.674    | -1.648 | 2.538  |
| <b>Ketone bodies</b>                  |     |        |                 |        |       |           |          |        |       |        |          |        |        |
| Acetate                               | 153 | 0.027  | 0.561           | -0.064 | 0.118 | -0.025    | 0.305    | -0.074 | 0.023 | 0.226  | 0.736    | -1.099 | 1.550  |
| Acetoacetate                          | 153 | 0.011  | 0.717           | -0.050 | 0.072 | 0.020     | 0.527    | -0.042 | 0.081 | -1.239 | 0.141    | -2.896 | 0.419  |
| 3-hydroxybutyrate                     | 151 | 0.064  | 0.024           | 0.009  | 0.119 | -0.029    | 0.184    | -0.072 | 0.014 | 1.001  | 0.098    | -0.187 | 2.189  |
| <b>Fluid balance</b>                  |     |        |                 |        |       |           |          |        |       |        |          |        |        |
| Creatinine                            | 152 | -0.019 | 0.546           | -0.082 | 0.044 | -0.004    | 0.858    | -0.044 | 0.037 | -0.296 | 0.608    | -1.436 | 0.844  |
| Albumin                               | 153 | -0.002 | 0.946           | -0.060 | 0.056 | -0.039    | 0.288    | -0.110 | 0.033 | 0.743  | 0.449    | -1.195 | 2.681  |
| <b>Inflammation markers</b>           |     |        |                 |        |       |           |          |        |       |        |          |        |        |
| Glycoprotein acetyls                  | 153 | 0.116  | <b>0.001</b>    | 0.050  | 0.182 | 0.000     | 0.997    | -0.041 | 0.041 | 0.387  | 0.490    | -0.722 | 1.496  |



Used model: Metabolite =  $\beta_0 + \beta_1 * \text{BMI} + \beta_2 * (\text{SLM} \times \text{BMI}) + \beta_3 * \text{SLM} + \beta_4 * \text{Age} + \beta_5 * \text{Gender} + \beta_6 * \text{Status} + \beta_7 * \text{Lipid lowering medication} + \beta_8 * \text{Antihypertensive medication} + u_1 * \text{Household} + \epsilon$

BMI reports  $\beta_1$ , SLM x BMI reports  $\beta_2$ ; SLM reports  $\beta_3$

\* Bold p-values indicate significant associations after FDR correction. † % of total fatty acids

SLM, standardized liquid meal; Double bonds/fatty acids, the number of double bonds in fatty acids. VLDL, very low density lipoprotein; IDL, intermediate density lipoprotein; LDL, low density lipoprotein; HDL, high density lipoprotein.

**Supplementary Table S5** | Effect size of the association between diastolic blood pressure and metabolites before and after the standardized liquid meal

|                                                   | N   | B      | fasting<br>p-value* | 95% CI |        | B      | postprandial<br>p-value* | 95% CI |        |
|---------------------------------------------------|-----|--------|---------------------|--------|--------|--------|--------------------------|--------|--------|
| <b>Fatty acids</b>                                |     |        |                     |        |        |        |                          |        |        |
| Total fatty acids                                 | 147 | 0.028  | 0.005               | 0.009  | 0.048  | 0.026  | 0.003                    | 0.009  | 0.044  |
| Fatty acid chain length                           | 147 | -0.002 | 0.857               | -0.019 | 0.016  | 0.001  | 0.948                    | -0.026 | 0.028  |
| Double bonds / fatty acids                        | 147 | -0.030 | <b>0.001</b>        | -0.047 | -0.013 | -0.034 | 0.007                    | -0.058 | -0.009 |
| Docosahexaenoic acid                              | 147 | -0.013 | 0.316               | -0.038 | 0.012  | -0.015 | 0.245                    | -0.039 | 0.010  |
| Linoleic acid                                     | 147 | 0.027  | 0.002               | 0.010  | 0.045  | 0.025  | 0.003                    | 0.009  | 0.041  |
| Omega-3 fatty acids                               | 147 | -0.002 | 0.879               | -0.026 | 0.022  | -0.004 | 0.734                    | -0.026 | 0.019  |
| Omega-6 fatty acids                               | 147 | 0.023  | 0.016               | 0.004  | 0.042  | 0.021  | 0.014                    | 0.004  | 0.038  |
| Polyunsaturated fatty acids                       | 147 | 0.021  | 0.036               | 0.001  | 0.040  | 0.019  | 0.036                    | 0.001  | 0.036  |
| Monounsaturated fatty acids                       | 147 | 0.029  | 0.003               | 0.010  | 0.048  | 0.030  | 0.001                    | 0.013  | 0.047  |
| Saturated fatty acids                             | 147 | 0.027  | 0.005               | 0.008  | 0.046  | 0.023  | 0.025                    | 0.003  | 0.043  |
| <b>Fatty acids, relative to total fatty acids</b> |     |        |                     |        |        |        |                          |        |        |
| Omega-3 fatty acids (%) <sup>†</sup>              | 147 | -0.027 | 0.019               | -0.049 | -0.005 | -0.028 | 0.023                    | -0.052 | -0.004 |
| Omega-6 fatty acids (%) <sup>†</sup>              | 147 | -0.013 | 0.134               | -0.031 | 0.004  | -0.013 | 0.173                    | -0.032 | 0.006  |
| Polyunsaturated fatty acids (%) <sup>†</sup>      | 147 | -0.020 | 0.021               | -0.036 | -0.003 | -0.020 | 0.060                    | -0.040 | 0.001  |
| Monounsaturated fatty acids (%) <sup>†</sup>      | 147 | 0.019  | 0.029               | 0.002  | 0.037  | 0.023  | 0.020                    | 0.004  | 0.042  |
| Saturated fatty acids (%) <sup>†</sup>            | 147 | 0.002  | 0.833               | -0.015 | 0.019  | -0.006 | 0.676                    | -0.037 | 0.024  |
| <b>Cholesterol</b>                                |     |        |                     |        |        |        |                          |        |        |
| Total cholesterol                                 | 154 | 0.017  | 0.062               | -0.001 | 0.036  | 0.014  | 0.085                    | -0.002 | 0.030  |
| non HDL cholesterol                               | 154 | 0.021  | 0.019               | 0.004  | 0.039  | 0.017  | 0.035                    | 0.001  | 0.032  |
| VLDL cholesterol                                  | 154 | 0.024  | 0.010               | 0.006  | 0.043  | 0.019  | 0.016                    | 0.004  | 0.034  |
| IDL cholesterol                                   | 154 | 0.017  | 0.057               | -0.001 | 0.034  | 0.014  | 0.070                    | -0.001 | 0.028  |
| LDL cholesterol                                   | 154 | 0.018  | 0.042               | 0.001  | 0.035  | 0.013  | 0.101                    | -0.003 | 0.029  |
| HDL cholesterol                                   | 154 | -0.008 | 0.421               | -0.027 | 0.011  | -0.007 | 0.478                    | -0.027 | 0.013  |
| Cholesterol esterification                        | 147 | 0.018  | 0.052               | 0.000  | 0.037  | 0.015  | 0.060                    | -0.001 | 0.031  |

**Supplementary Table S5 (continued)** | Effect size of the association between diastolic blood pressure and metabolites before and after the standardized liquid meal

|                                        | N   | B      | fasting<br>p-value* | 95% CI |       | B      | postprandial<br>p-value* | 95% CI |       |
|----------------------------------------|-----|--------|---------------------|--------|-------|--------|--------------------------|--------|-------|
| <b>Lipoprotein lipid concentration</b> |     |        |                     |        |       |        |                          |        |       |
| Extremely large VLDL                   | 150 | 0.025  | 0.008               | 0.007  | 0.043 | 0.034  | 0.006                    | 0.010  | 0.057 |
| Very large VLDL                        | 149 | 0.026  | 0.010               | 0.006  | 0.046 | 0.030  | 0.009                    | 0.008  | 0.052 |
| Large VLDL                             | 151 | 0.027  | 0.015               | 0.005  | 0.048 | 0.026  | 0.009                    | 0.007  | 0.045 |
| Medium VLDL                            | 154 | 0.028  | 0.006               | 0.008  | 0.047 | 0.023  | 0.005                    | 0.007  | 0.039 |
| Small VLDL                             | 154 | 0.024  | 0.013               | 0.005  | 0.043 | 0.018  | 0.022                    | 0.003  | 0.034 |
| Very small VLDL                        | 154 | 0.018  | 0.063               | -0.001 | 0.037 | 0.013  | 0.082                    | -0.002 | 0.028 |
| IDL                                    | 154 | 0.017  | 0.064               | -0.001 | 0.035 | 0.014  | 0.074                    | -0.001 | 0.030 |
| Large LDL                              | 154 | 0.018  | 0.046               | 0.000  | 0.036 | 0.015  | 0.073                    | -0.001 | 0.031 |
| Medium LDL                             | 154 | 0.019  | 0.037               | 0.001  | 0.036 | 0.014  | 0.089                    | -0.002 | 0.031 |
| Small LDL                              | 154 | 0.018  | 0.042               | 0.001  | 0.036 | 0.015  | 0.089                    | -0.002 | 0.032 |
| Very large HDL                         | 154 | -0.011 | 0.233               | -0.030 | 0.007 | -0.007 | 0.398                    | -0.022 | 0.009 |
| Large HDL                              | 149 | -0.007 | 0.389               | -0.025 | 0.010 | -0.006 | 0.493                    | -0.023 | 0.011 |
| Medium HDL                             | 154 | 0.005  | 0.632               | -0.015 | 0.024 | 0.009  | 0.449                    | -0.014 | 0.031 |
| Small HDL                              | 154 | 0.012  | 0.205               | -0.006 | 0.030 | 0.008  | 0.445                    | -0.013 | 0.028 |
| <b>Lipoprotein particle size</b>       |     |        |                     |        |       |        |                          |        |       |
| VLDL diameter                          | 154 | 0.026  | 0.009               | 0.006  | 0.045 | 0.024  | 0.005                    | 0.007  | 0.041 |
| LDL diameter                           | 154 | -0.007 | 0.471               | -0.025 | 0.012 | -0.004 | 0.642                    | -0.023 | 0.014 |
| HDL diameter                           | 154 | -0.011 | 0.203               | -0.028 | 0.006 | -0.008 | 0.341                    | -0.025 | 0.009 |
| <b>Apolipoproteins and lipids</b>      |     |        |                     |        |       |        |                          |        |       |
| Triglycerides                          | 154 | 0.027  | 0.007               | 0.008  | 0.046 | 0.025  | 0.005                    | 0.008  | 0.042 |
| Total phosphoglyceride                 | 147 | 0.018  | 0.054               | 0.000  | 0.037 | 0.015  | 0.082                    | -0.002 | 0.033 |
| Phosphatidylcholines                   | 147 | 0.019  | 0.050               | 0.000  | 0.038 | 0.016  | 0.073                    | -0.002 | 0.034 |
| Sphingomyelins                         | 147 | 0.006  | 0.500               | -0.012 | 0.025 | 0.002  | 0.850                    | -0.016 | 0.019 |
| Apolipoprotein A-I                     | 154 | 0.002  | 0.823               | -0.016 | 0.020 | 0.003  | 0.741                    | -0.016 | 0.022 |
| Apolipoprotein B                       | 154 | 0.024  | 0.013               | 0.005  | 0.043 | 0.020  | 0.015                    | 0.004  | 0.036 |

**Supplementary Table S5 (continued)** | Effect size of the association between diastolic blood pressure and metabolites before and after the standardized liquid meal

|                                       | N   | B      | fasting<br>p-value* | 95% CI        | B      | postprandial<br>p-value* | 95% CI       |  |  |
|---------------------------------------|-----|--------|---------------------|---------------|--------|--------------------------|--------------|--|--|
| <b>Glycolysis related metabolites</b> |     |        |                     |               |        |                          |              |  |  |
| Glucose                               | 154 | 0.011  | 0.051               | 0.000 0.022   | 0.017  | 0.117                    | -0.004 0.038 |  |  |
| Lactate                               | 154 | 0.017  | 0.045               | 0.000 0.034   | 0.011  | 0.342                    | -0.012 0.035 |  |  |
| Pyruvate                              | 152 | 0.003  | 0.786               | -0.017 0.022  | 0.015  | 0.161                    | -0.006 0.037 |  |  |
| Citrate                               | 154 | 0.020  | 0.043               | 0.001 0.039   | 0.017  | 0.148                    | -0.006 0.040 |  |  |
| Glycerol                              | 152 | 0.007  | 0.149               | -0.003 0.017  | 0.019  | 0.047                    | 0.000 0.039  |  |  |
| <b>Amino acids</b>                    |     |        |                     |               |        |                          |              |  |  |
| Alanine                               | 152 | 0.006  | 0.494               | -0.011 0.023  | 0.005  | 0.594                    | -0.015 0.025 |  |  |
| Glutamine                             | 152 | 0.008  | 0.429               | -0.012 0.029  | 0.010  | 0.348                    | -0.011 0.030 |  |  |
| Glycine                               | 136 | -0.017 | 0.037               | -0.033 -0.001 | -0.014 | 0.162                    | -0.034 0.006 |  |  |
| Histidine                             | 154 | 0.006  | 0.511               | -0.012 0.024  | 0.002  | 0.806                    | -0.017 0.022 |  |  |
| Isoleucine                            | 151 | 0.012  | 0.238               | -0.008 0.031  | 0.009  | 0.313                    | -0.008 0.026 |  |  |
| Leucine                               | 153 | 0.006  | 0.465               | -0.010 0.021  | 0.007  | 0.418                    | -0.010 0.023 |  |  |
| Valine                                | 152 | 0.001  | 0.954               | -0.021 0.022  | 0.003  | 0.818                    | -0.020 0.026 |  |  |
| Phenylalanine                         | 154 | 0.004  | 0.721               | -0.017 0.025  | 0.001  | 0.947                    | -0.022 0.024 |  |  |
| Tyrosine                              | 154 | 0.009  | 0.393               | -0.012 0.030  | 0.009  | 0.412                    | -0.012 0.030 |  |  |
| <b>Ketone bodies</b>                  |     |        |                     |               |        |                          |              |  |  |
| Acetate                               | 154 | 0.020  | 0.217               | -0.012 0.052  | 0.023  | 0.069                    | -0.002 0.048 |  |  |
| Acetoacetate                          | 154 | 0.009  | 0.369               | -0.010 0.028  | 0.005  | 0.658                    | -0.016 0.025 |  |  |
| 3-hydroxybutyrate                     | 152 | 0.012  | 0.243               | -0.008 0.032  | 0.006  | 0.553                    | -0.014 0.025 |  |  |
| <b>Fluid balance</b>                  |     |        |                     |               |        |                          |              |  |  |
| Creatinine                            | 153 | 0.008  | 0.409               | -0.011 0.028  | 0.006  | 0.584                    | -0.015 0.027 |  |  |
| Albumin                               | 154 | 0.007  | 0.460               | -0.012 0.026  | 0.009  | 0.481                    | -0.016 0.034 |  |  |
| <b>Inflammation markers</b>           |     |        |                     |               |        |                          |              |  |  |
| Glycoprotein acetyls                  | 154 | 0.019  | 0.071               | -0.002 0.040  | 0.022  | 0.039                    | 0.001 0.043  |  |  |

Effect sizes indicate the association magnitudes in units of 1-SD metabolite concentration per 1-mmHg increment in diastolic blood pressure.

\* Bold p-values indicate significant associations after FDR correction. † % of total fatty acids

Double bonds/fatty acids: the number of double bonds in fatty acids. VLDL, very low density lipoprotein; IDL, intermediate density lipoprotein; LDL, low density lipoprotein; HDL, high density lipoprotein.

**Supplementary Table S6** | Effect size of the association between insulin and metabolites before and after the standardized liquid meal

|                                                   | N   | B      | fasting<br>p-value* | 95% CI        | B      | postprandial<br>p-value* | 95% CI        |  |  |
|---------------------------------------------------|-----|--------|---------------------|---------------|--------|--------------------------|---------------|--|--|
| <b>Fatty acids</b>                                |     |        |                     |               |        |                          |               |  |  |
| Total fatty acids                                 | 148 | 0.043  | 0.053               | 0.000 0.086   | 0.005  | 0.106                    | -0.001 0.012  |  |  |
| Fatty acid chain length                           | 148 | 0.011  | 0.351               | -0.013 0.036  | 0.007  | 0.044                    | 0.000 0.013   |  |  |
| Double bonds / fatty acids                        | 148 | -0.039 | 0.047               | -0.078 -0.001 | -0.008 | <b>0.015</b>             | -0.014 -0.002 |  |  |
| Docosahexaenoic acid                              | 148 | 0.014  | 0.432               | -0.021 0.048  | 0.003  | 0.407                    | -0.004 0.009  |  |  |
| Linoleic acid                                     | 148 | 0.028  | 0.105               | -0.006 0.062  | 0.003  | 0.387                    | -0.004 0.009  |  |  |
| Omega-3 fatty acids                               | 148 | 0.017  | 0.355               | -0.019 0.052  | 0.003  | 0.432                    | -0.004 0.010  |  |  |
| Omega-6 fatty acids                               | 148 | 0.026  | 0.155               | -0.010 0.062  | 0.002  | 0.579                    | -0.005 0.008  |  |  |
| Polyunsaturated fatty acids                       | 148 | 0.026  | 0.153               | -0.010 0.062  | 0.002  | 0.544                    | -0.005 0.009  |  |  |
| Monounsaturated fatty acids                       | 148 | 0.050  | 0.036               | 0.003 0.096   | 0.006  | 0.050                    | 0.000 0.012   |  |  |
| Saturated fatty acids                             | 148 | 0.040  | 0.051               | 0.000 0.081   | 0.006  | 0.071                    | -0.001 0.012  |  |  |
| <b>Fatty acids, relative to total fatty acids</b> |     |        |                     |               |        |                          |               |  |  |
| Omega-3 fatty acids (%) <sup>†</sup>              | 148 | -0.017 | 0.402               | -0.058 0.023  | -0.001 | 0.678                    | -0.008 0.005  |  |  |
| Omega-6 fatty acids (%) <sup>†</sup>              | 148 | -0.038 | 0.028               | -0.071 -0.004 | -0.008 | <b>0.005</b>             | -0.013 -0.002 |  |  |
| Polyunsaturated fatty acids (%) <sup>†</sup>      | 148 | -0.040 | 0.035               | -0.078 -0.003 | -0.008 | <b>0.009</b>             | -0.013 -0.002 |  |  |
| Monounsaturated fatty acids (%) <sup>†</sup>      | 148 | 0.040  | 0.054               | -0.001 0.080  | 0.005  | 0.091                    | -0.001 0.011  |  |  |
| Saturated fatty acids (%) <sup>†</sup>            | 148 | -0.001 | 0.946               | -0.026 0.024  | 0.003  | 0.397                    | -0.004 0.009  |  |  |
| <b>Cholesterol</b>                                |     |        |                     |               |        |                          |               |  |  |
| Total cholesterol                                 | 155 | 0.008  | 0.622               | -0.024 0.040  | 0.000  | 0.918                    | -0.006 0.007  |  |  |
| non HDL cholesterol                               | 155 | 0.033  | 0.048               | 0.000 0.066   | 0.002  | 0.502                    | -0.005 0.009  |  |  |
| VLDL cholesterol                                  | 155 | 0.058  | <b>0.004</b>        | 0.019 0.096   | 0.004  | 0.124                    | -0.001 0.010  |  |  |
| IDL cholesterol                                   | 155 | 0.014  | 0.393               | -0.018 0.045  | 0.000  | 0.933                    | -0.007 0.007  |  |  |
| LDL cholesterol                                   | 155 | 0.022  | 0.163               | -0.009 0.052  | 0.001  | 0.700                    | -0.006 0.008  |  |  |
| HDL cholesterol                                   | 155 | -0.070 | <b>0.001</b>        | -0.111 -0.030 | -0.007 | <b>0.002</b>             | -0.012 -0.003 |  |  |
| Cholesterol esterification                        | 148 | 0.009  | 0.571               | -0.024 0.043  | 0.001  | 0.829                    | -0.006 0.008  |  |  |

**Supplementary Table S6 (continued)** | Effect size of the association between insulin and metabolites before and after the standardized liquid meal

|                                        | N   | B      | fasting<br>p-value* | 95% CI |        | B      | postprandial<br>p-value* | 95% CI |        |
|----------------------------------------|-----|--------|---------------------|--------|--------|--------|--------------------------|--------|--------|
| <b>Lipoprotein lipid concentration</b> |     |        |                     |        |        |        |                          |        |        |
| Extremely large VLDL                   | 151 | 0.064  | <b>0.014</b>        | 0.013  | 0.114  | 0.009  | <b>0.008</b>             | 0.002  | 0.016  |
| Very large VLDL                        | 150 | 0.073  | <b>0.018</b>        | 0.013  | 0.133  | 0.009  | <b>0.003</b>             | 0.003  | 0.015  |
| Large VLDL                             | 152 | 0.083  | <b>0.006</b>        | 0.025  | 0.142  | 0.009  | <b>0.001</b>             | 0.004  | 0.015  |
| Medium VLDL                            | 155 | 0.081  | <b>1.36E-04</b>     | 0.040  | 0.121  | 0.008  | <b>0.002</b>             | 0.003  | 0.013  |
| Small VLDL                             | 155 | 0.065  | <b>0.001</b>        | 0.026  | 0.104  | 0.006  | 0.040                    | 0.000  | 0.011  |
| Very small VLDL                        | 155 | 0.034  | 0.051               | 0.000  | 0.068  | 0.002  | 0.538                    | -0.004 | 0.008  |
| IDL                                    | 155 | 0.016  | 0.324               | -0.016 | 0.049  | 0.000  | 0.900                    | -0.007 | 0.008  |
| Large LDL                              | 155 | 0.021  | 0.210               | -0.012 | 0.053  | 0.001  | 0.751                    | -0.006 | 0.008  |
| Medium LDL                             | 155 | 0.027  | 0.088               | -0.004 | 0.058  | 0.002  | 0.572                    | -0.005 | 0.009  |
| Small LDL                              | 155 | 0.026  | 0.094               | -0.005 | 0.057  | 0.003  | 0.448                    | -0.004 | 0.010  |
| Very large HDL                         | 155 | -0.063 | <b>4.20E-04</b>     | -0.097 | -0.029 | -0.005 | <b>0.010</b>             | -0.010 | -0.001 |
| Large HDL                              | 150 | -0.059 | <b>0.001</b>        | -0.094 | -0.025 | -0.006 | <b>0.014</b>             | -0.011 | -0.001 |
| Medium HDL                             | 155 | -0.038 | <b>0.020</b>        | -0.069 | -0.006 | -0.004 | 0.027                    | -0.008 | -0.001 |
| Small HDL                              | 155 | 0.012  | 0.415               | -0.017 | 0.041  | 0.001  | 0.635                    | -0.003 | 0.005  |
| <b>Lipoprotein particle size</b>       |     |        |                     |        |        |        |                          |        |        |
| VLDL diameter                          | 155 | 0.082  | <b>2.33E-04</b>     | 0.040  | 0.125  | 0.009  | <b>7.45E-05</b>          | 0.005  | 0.014  |
| LDL diameter                           | 155 | -0.027 | 0.046               | -0.053 | -0.001 | -0.006 | 0.018                    | -0.010 | -0.001 |
| HDL diameter                           | 155 | -0.074 | <b>4.78E-05</b>     | -0.109 | -0.040 | -0.008 | <b>4.23E-04</b>          | -0.012 | -0.004 |
| <b>Apolipoproteins and lipids</b>      |     |        |                     |        |        |        |                          |        |        |
| Triglycerides                          | 155 | 0.074  | <b>0.001</b>        | 0.032  | 0.116  | 0.008  | <b>0.003</b>             | 0.003  | 0.014  |
| Total phosphoglyceride                 | 148 | -0.004 | 0.804               | -0.038 | 0.030  | -0.001 | 0.688                    | -0.006 | 0.004  |
| Phosphatidylcholines                   | 148 | -0.005 | 0.771               | -0.037 | 0.027  | -0.001 | 0.641                    | -0.006 | 0.004  |
| Sphingomyelins                         | 148 | 0.007  | 0.696               | -0.026 | 0.039  | -0.001 | 0.770                    | -0.008 | 0.006  |
| Apolipoprotein A-I                     | 155 | -0.048 | <b>0.004</b>        | -0.080 | -0.015 | -0.004 | 0.040                    | -0.009 | 0.000  |
| Apolipoprotein B                       | 155 | 0.049  | <b>0.013</b>        | 0.011  | 0.088  | 0.004  | 0.204                    | -0.002 | 0.011  |

**Supplementary Table S6 (continued)** | Effect size of the association between insulin and metabolites before and after the standardized liquid meal

|                                       | N   | B      | fasting<br>p-value* | 95% CI |       | B      | postprandial<br>p-value* | 95% CI |       |
|---------------------------------------|-----|--------|---------------------|--------|-------|--------|--------------------------|--------|-------|
| <b>Glycolysis related metabolites</b> |     |        |                     |        |       |        |                          |        |       |
| Glucose                               | 155 | 0.029  | <b>0.005</b>        | 0.009  | 0.049 | 0.006  | 0.049                    | 0.000  | 0.012 |
| Lactate                               | 155 | 0.049  | <b>2.46E-05</b>     | 0.027  | 0.072 | 0.008  | <b>0.007</b>             | 0.002  | 0.014 |
| Pyruvate                              | 153 | 0.048  | <b>0.005</b>        | 0.015  | 0.080 | 0.005  | 0.151                    | -0.002 | 0.011 |
| Citrate                               | 155 | 0.041  | <b>0.016</b>        | 0.008  | 0.073 | 0.007  | <b>0.003</b>             | 0.003  | 0.012 |
| Glycerol                              | 153 | 0.028  | <b>0.001</b>        | 0.011  | 0.045 | 0.006  | <b>0.001</b>             | 0.003  | 0.010 |
| <b>Amino acids</b>                    |     |        |                     |        |       |        |                          |        |       |
| Alanine                               | 153 | 0.025  | 0.075               | -0.003 | 0.052 | 0.007  | <b>0.006</b>             | 0.002  | 0.012 |
| Glutamine                             | 153 | -0.022 | 0.219               | -0.057 | 0.013 | -0.004 | 0.213                    | -0.011 | 0.002 |
| Glycine                               | 137 | -0.024 | 0.063               | -0.049 | 0.001 | -0.003 | 0.297                    | -0.008 | 0.002 |
| Histidine                             | 155 | 0.018  | 0.251               | -0.013 | 0.049 | -0.001 | 0.672                    | -0.007 | 0.004 |
| Isoleucine                            | 152 | 0.079  | <b>6.91E-06</b>     | 0.046  | 0.112 | 0.009  | <b>2.73E-06</b>          | 0.006  | 0.013 |
| Leucine                               | 154 | 0.049  | <b>3.38E-05</b>     | 0.027  | 0.071 | 0.008  | <b>1.87E-05</b>          | 0.004  | 0.012 |
| Valine                                | 153 | 0.060  | <b>2.41E-06</b>     | 0.036  | 0.084 | 0.005  | 0.039                    | 0.000  | 0.010 |
| Phenylalanine                         | 155 | 0.065  | <b>9.19E-06</b>     | 0.037  | 0.093 | 0.009  | <b>0.001</b>             | 0.004  | 0.014 |
| Tyrosine                              | 155 | 0.060  | <b>4.06E-06</b>     | 0.035  | 0.084 | 0.009  | <b>3.69E-04</b>          | 0.004  | 0.015 |
| <b>Ketone bodies</b>                  |     |        |                     |        |       |        |                          |        |       |
| Acetate                               | 155 | 0.008  | 0.671               | -0.031 | 0.048 | -0.001 | 0.496                    | -0.005 | 0.002 |
| Acetoacetate                          | 155 | 0.013  | 0.400               | -0.018 | 0.045 | -0.004 | 0.136                    | -0.009 | 0.001 |
| 3-hydroxybutyrate                     | 153 | 0.054  | <b>0.001</b>        | 0.023  | 0.086 | 0.006  | <b>0.008</b>             | 0.002  | 0.010 |
| <b>Fluid balance</b>                  |     |        |                     |        |       |        |                          |        |       |
| Creatinine                            | 154 | 0.019  | 0.132               | -0.006 | 0.043 | 0.001  | 0.453                    | -0.002 | 0.005 |
| Albumin                               | 155 | 0.011  | 0.411               | -0.016 | 0.038 | -0.001 | 0.767                    | -0.008 | 0.006 |
| <b>Inflammation markers</b>           |     |        |                     |        |       |        |                          |        |       |
| Glycoprotein acetyls                  | 155 | 0.088  | <b>2.04E-04</b>     | 0.043  | 0.133 | 0.007  | 0.057                    | 0.000  | 0.015 |

Effect sizes indicate the association magnitudes in units of 1-SD metabolite concentration per 1-MU/L increment in insulin.

\* Bold p-values indicate significant associations after FDR correction. † % of total fatty acids



Double bonds/fatty acids: the number of double bonds in fatty acids. VLDL, very low density lipoprotein; IDL, intermediate density lipoprotein; LDL, low density lipoprotein; HDL, high density lipoprotein.

**Supplementary Table S7** | Nutritional content Nutridrink

per 100 ml:

| <b>Energy</b>                 | 150/625 | kcal/kJ | <b>Trace elements</b> |      |          |
|-------------------------------|---------|---------|-----------------------|------|----------|
|                               |         |         | Iron                  | 2.4  | mg       |
| <b>Fat</b> (35 En%)           | 5.8     | g       | Zinc                  | 1.8  | mg       |
| Saturated fat                 | 0.6     | g       | Copper                | 0.27 | mg       |
| Monounsaturated fat           | 3.5     | g       | Manganese             | 0.5  | mg       |
| Polyunsaturated fat           | 1.7     | g       | Fluorine              | 0.15 | mg       |
| Linoleic acid                 | 1.4     | g       | Molybdenum            | 15   | µg       |
| α-Linolenic acid              | 0.27    | g       | Selenium              | 8.6  | µg       |
| Arachidonic acid              | -       | mg      | Chromium              | 10   | µg       |
| Docosahexaenoic acid          | -       | mg      | Iodine                | 20   | µg       |
| Eicosapentaenoic acid         | -       | mg      |                       |      |          |
|                               |         |         | <b>Vitamins</b>       |      |          |
| <b>Carbohydrates</b> (49 En%) | 18.4    | g       | A                     | 123  | µg-RE    |
| Glucose                       | 0.1     | g       | Carotenoids           | 0.3  | mg       |
| Fructose                      | -       | g       | D                     | 1.1  | µg       |
| Lactose                       | <0.025  | g       | E                     | 1.9  | mg α-TE  |
| Maltose                       | 0.6     | g       | K                     | 8    | µg       |
| Sacharose                     | 6       | g       | Thiamine              | 0.23 | mg       |
| Polysacharose                 | 11.3    | g       | Riboflavin            | 0.24 | mg       |
| Others                        | 0.4     | g       | Niacin                | 2.7  | mg NE    |
|                               |         |         | Pantothenic acid      | 0.8  | mg       |
| <b>Fibers</b>                 | -       | g       |                       |      |          |
|                               |         |         | <b>Others</b>         |      |          |
| <b>Protein</b> (16 En%)       | 5.9     | g       | Carnitine             | -    | mg       |
| Casein                        | 5.9     | g       | Choline               | 55   | mg       |
| Whey protein                  | -       | g       | Taurine               | -    | mg       |
| <b>Salt</b>                   | 0.23    | g       | <b>Osmolarity</b>     | 455  | mOsmol/l |
| <b>Liquids</b>                | 78      | ml      |                       |      |          |
|                               |         |         |                       |      |          |
| <b>Minerals</b>               |         |         |                       |      |          |
| Sodium                        | 90      | mg      |                       |      |          |
| Potassium                     | 159     | mg      |                       |      |          |
| Chlorine                      | 87      | mg      |                       |      |          |
| Calcium                       | 91      | mg      |                       |      |          |
| Phosphorus                    | 78      | mg      |                       |      |          |
| Magnesium                     | 23      | mg      |                       |      |          |

**Supplementary Table S8** | Nutritional content amino acids Nutridrink

per 100 ml:

---

|                                  |          |
|----------------------------------|----------|
| L-Alanine                        | 193 mg   |
| L-Arginine                       | 227 mg   |
| L-Asparagine zuur / L-Asparagine | 446 mg   |
| L-Cystine                        | 20.8 mg  |
| L-Glutaminezuur / L-Glutamine    | 1,394 mg |
| Glycine                          | 115 mg   |
| L-Histidine                      | 186 mg   |
| L-Isoleucine                     | 338 mg   |
| L-Leucine                        | 606 mg   |
| L-Lysine                         | 545 mg   |
| L-Methionine                     | 183 mg   |
| L-Fenylalanine                   | 323 mg   |
| L-Proline                        | 600 mg   |
| L-Serine                         | 381 mg   |
| L-Threonine                      | 279 mg   |
| L-Tryptofaan                     | 82.2 mg  |
| L-Tyrosine                       | 349 mg   |
| L-Valine                         | 432 mg   |
| L-Methione + L-Cystine           | 204 mg   |
| L-Phenylalanine + L-Tyrosine     | 673 mg   |

---

## References

<sup>1</sup>Würtz. P. *et al.* Metabolic signatures of adiposity in young adults: Mendelian randomization analysis and effects of weight change. *PLoS. Med.* 11. e1001765 (2014).
